# Supplementary material
Source: publisher figshare collection journal article supplement (https://acs.figshare.com/ndownloader/files/22202106)
Supplement: Supplementary file 1 [file 22202106]

## Supporting Figures

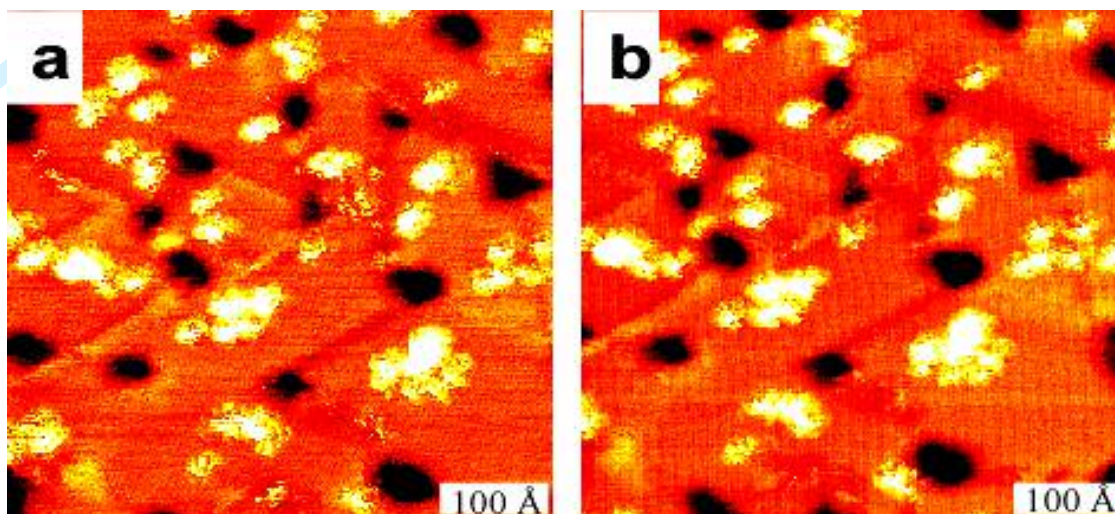

**Supplementary Figure 1:** With time (1 hr), but no illumination, no change in apparent height was observed in scanning tunneling microscope images while recording under similar conditions ( $I_t = 2$  pA;  $V_s = 1.0$  V) to those used to record Fig. 1.

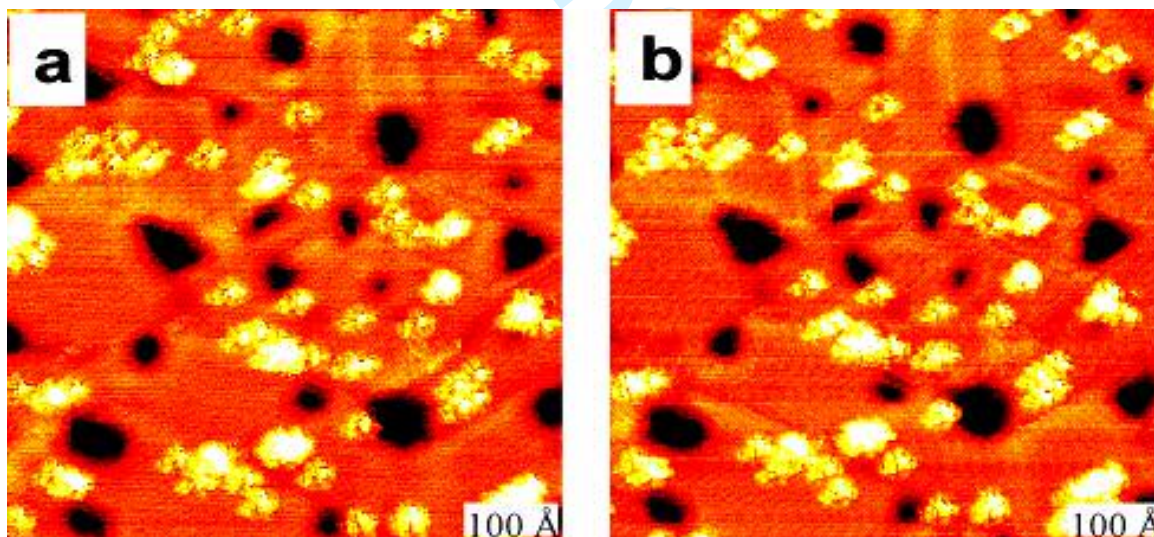

**Supplementary Figure 2:** With sample bias polarity ( $V_s$ ) change (but still no illumination), (a) 1.0 V to (b) -1.0 V, no significant change in apparent height was observed ( $I_t = 2$  pA) in scanning tunneling microscope images.
